# Supplementary material
Source: MDPI journal article supplement (https://www.mdpi.com/2504-5377/2/3/33)
Supplement: s1 [file s1]

## Cholate Adsorption Behavior at Carbon Electrode Interface and Its Promotional Effect in Laccase Direct Bioelectrocatalysis

Masato Tominaga\*, Motofumi Tsutsui, Takuya Takatori

Graduate School of Science and Engineering, Saga University, Saga 840-8502, Japan

\* Correspondence: masato@cc.saga-u.ac.jp; Tel.: +81-952-28-8561

### Results and Discussion

#### Simulated analysis of steady-state current density

The steady-state current density ( $j_s$ ) for the adsorption model is given by [1-4]

$$j_a = nFk_c\Gamma_a / [1 + (k_c/k_f) + (k_b/k_f)]$$

$$k_f = k^\circ \exp [-\alpha (nF/RT) (E - E^\circ)]$$

$$k_b = k^\circ \exp [(1 - \alpha) (nF/RT) (E - E^\circ)] \quad (1)$$

where  $n$  and  $F$  are the number of electrons ( $n = 1$  for the T1 Cu site of Lac) and the Faraday constant, respectively;  $k_c$  is the catalytic constant ( $s^{-1}$ ), and was assumed to be  $2600 s^{-1}$  because the theoretical rate of  $O_2$  reduction by the T2/3 Cu site of bilirubin oxidase is expected to be as high as  $2600 s^{-1}$  under air-saturated conditions [5,6];  $k_f$  and  $k_b$  are the surface electron transfer rate constants expressed by the Butler–Volmer equation; and  $E^\circ$  is similar to the formal redox potential for the T1 Cu site of Lac. In this study,  $E^\circ$  was estimated from the half-wave potential from the steady-state sigmoidal wave obtained at each modified SWCNT electrode.  $k^\circ$  and  $\alpha$  are the heterogeneous electron transfer rate constant ( $s^{-1}$ ) at  $E^\circ$  between the adsorbed Lac and SWCNT electrode, and the transfer coefficient, respectively. In this study,  $k^\circ$ ,  $\Gamma_a$ , and  $\alpha$  were adjustable parameters. We assumed that the dependence of the catalytic reduction current on the mass transport of oxygen could be ignored.

## References

1. S. Tsujimura, T. Nakagawa and K. Kano, T. Ikeda, *Electrochem.*, 2004, **72**, 437.
2. M. Tominaga, M. Ohtani and I. Taniguchi, *Phys. Chem. Chem. Phys.*, 2008, **10**, 6928.
3. M. Tominaga, A. Sasaki, M. Tsushida and M. Togami, *New J. Chem.*, 2017, **41**, 231.
4. S. Tsujimura, K. Kano and T. Ikeda, *J. Electroanal. Chem.*, 2005, **576**, 113.
5. S. Shleev, V. Andoralov, M. Falk, C. T. Reimann, T. Ruzgas, M. Srnec, U. Ryde and L. Rulíšek, *Electroanalysis*, 2012, **24**, 1524.
6. I. Matijošyte, I. W. C. E. Arends, R. A. Sheldon and S. Vries, *Inorg. Chim. Acta*, 2008, **361**, 1202.
